# Supplementary material for: A series of organic hybrid polyoxovanadate clusters incorporating tris(hydroxymethyl)methane derivatives
Source: Royal Society of Chemistry journal article supplement (doi:10.1039/d1dt02912f), 2021-01-01
Supplement: d1dt02912f1.pdf [file d1dt02912f1.pdf]

Supporting Information

A series of organic hybrid polyoxovanadate clusters incorporating  
tris(hydroxymethyl)methane derivatives

Li Huang, Congrui Ouyang, Xing Liu, Jian Zhou,\* Hua-hong Zou,\* Hua Yuan,\* and Dou

Wen

Table S1 The bond valence sum of V atoms for 1-8.

| <b>1</b>            |            |          |                      |            |          |
|---------------------|------------|----------|----------------------|------------|----------|
| <b>Bonds</b>        |            | <b>v</b> | <b>Bonds</b>         |            | <b>v</b> |
| V1–O1               | 1.9988(18) | 0.559    | V2–O1                | 1.9719(19) | 0.602    |
| V1–O2 <sup>#1</sup> | 2.3186(18) | 0.236    | V2–O2                | 2.3394(18) | 0.223    |
| V1–O5 <sup>#1</sup> | 1.9667(19) | 0.610    | V2–O2 <sup>#1</sup>  | 2.0013(18) | 0.556    |
| V1–O6               | 1.604(2)   | 1.626    | V2–O4                | 1.5895(19) | 1.690    |
| V1–O7               | 1.9871(19) | 0.577    | V2–O5                | 1.9764(19) | 0.589    |
| V1–O8               | 1.9986(19) | 0.559    | V2–N1                | 2.121(2)   | 0.401    |
| sum                 |            | 4.169    | sum                  |            | 4.068    |
| <b>2</b>            |            |          |                      |            |          |
| <b>Bonds</b>        |            | <b>v</b> | <b>Bonds</b>         |            | <b>v</b> |
| V1–O1 <sup>#1</sup> | 2.0030(15) | 0.553    | V2–O1 <sup>#1</sup>  | 2.2880(15) | 0.256    |
| V1–O2               | 1.9613(16) | 0.619    | V2–O2                | 1.9903(16) | 0.572    |
| V1–O4               | 1.5962(17) | 1.661    | V2–O3                | 1.6005(18) | 1.642    |
| V1–O6               | 2.0009(16) | 0.556    | V2–O4 <sup>#1</sup>  | 1.9809(17) | 0.587    |
| V1–O1               | 2.3067(16) | 0.243    | V2–O6                | 2.0036(17) | 0.552    |
| V1–N1               | 2.1208(19) | 0.402    | V2–O8                | 1.9997(19) | 0.558    |
| sum                 |            | 4.036    | sum                  |            | 4.169    |
| <b>3a</b>           |            |          |                      |            |          |
| <b>Bonds</b>        |            | <b>v</b> | <b>Bonds</b>         |            | <b>v</b> |
| V1–O1               | 2.302(3)   | 0.246    | V3–O10               | 2.301(3)   | 0.247    |
| V1–O1 <sup>#1</sup> | 2.014(3)   | 0.537    | V3–O10 <sup>#1</sup> | 2.010(3)   | 0.543    |
| V1–O2               | 1.959(4)   | 0.623    | V3–O9                | 1.967(4)   | 0.609    |
| V1–N1               | 2.123(4)   | 0.400    | V3–O15               | 1.609(3)   | 1.604    |
| V1–O4               | 1.601(4)   | 1.640    | V3–O16               | 2.000(4)   | 0.557    |
| V1–O5               | 2.008(4)   | 0.545    | V3–N2                | 2.125(4)   | 0.398    |
| sum                 |            | 3.992    | sum                  |            | 3.960    |
| V2–O1               | 2.284(4)   | 0.258    | V4–O9                | 1.997(4)   | 0.562    |
| V2–O2 <sup>#1</sup> | 1.999(3)   | 0.559    | V4–O10 <sup>#2</sup> | 2.293(4)   | 0.252    |
| V2–O5               | 1.989(4)   | 0.575    | V4–O12               | 1.594(4)   | 1.671    |
| V2–O6               | 1.602(4)   | 1.635    | V4–O13               | 2.001(4)   | 0.556    |
| V2–O7               | 2.003(4)   | 0.553    | V4–O14               | 2.006(4)   | 0.548    |
| V2–O8               | 2.011(4)   | 0.541    | V4–O16 <sup>#2</sup> | 1.991(4)   | 0.571    |
| sum                 |            | 4.123    | sum                  |            | 4.163    |

| <b>3b</b>           |            |       |                      |            |       |
|---------------------|------------|-------|----------------------|------------|-------|
| <b>Bonds</b>        |            |       | <b>Bonds</b>         |            |       |
|                     |            | v     |                      |            | v     |
| V1—O1               | 2.2652(18) | 0.272 | V3—O9                | 1.966(2)   | 0.611 |
| V1—O1 <sup>#1</sup> | 1.9968(18) | 0.562 | V3—O10 <sup>#2</sup> | 1.9893(18) | 0.574 |
| V1—O2               | 1.964(2)   | 0.614 | V3—O10               | 2.2896(18) | 0.255 |
| V1—O4               | 1.6025(19) | 1.633 | V3—O12               | 1.6150(18) | 1.579 |
| V1—O8               | 1.991(2)   | 0.571 | V3—O13               | 1.990(2)   | 0.573 |
| V1—N1               | 2.136(2)   | 0.386 | V3—N2                | 2.119(2)   | 0.404 |
|                     | sum        | 4.041 |                      | sum        | 3.997 |
| V2—O1               | 2.327(2)   | 0.230 | V4—O9 <sup>#2</sup>  | 2.0141(19) | 0.537 |
| V2—O2 <sup>#1</sup> | 2.0075(19) | 0.546 | V4—O10               | 2.321(2)   | 0.235 |
| V2—O5               | 1.589(2)   | 1.694 | V4—O13               | 2.0062(19) | 0.548 |
| V2—O6               | 2.015(2)   | 0.536 | V4—O14               | 1.588(2)   | 1.698 |
| V2—O7               | 2.000(2)   | 0.558 | V4—O15               | 2.010(2)   | 0.543 |
| V2—O8               | 1.997(2)   | 0.562 | V4—O16               | 1.992(2)   | 0.569 |
|                     | sum        | 4.123 |                      | sum        | 4.131 |

  

| <b>4</b>            |          |       |                     |            |       |
|---------------------|----------|-------|---------------------|------------|-------|
| <b>Bonds</b>        |          |       | <b>Bonds</b>        |            |       |
|                     |          | v     |                     |            | v     |
| V1—O1 <sup>#1</sup> | 2.301(2) | 0.247 | V2—O1 <sup>#1</sup> | 2.014(2)   | 0.537 |
| V1—O2               | 1.998(2) | 0.561 | V2—O1               | 2.307(2)   | 0.243 |
| V1—O4 <sup>#1</sup> | 2.005(2) | 0.550 | V2—O2               | 1.965(2)   | 0.613 |
| V1—O7               | 2.012(2) | 0.539 | V2—O4               | 2.012(2)   | 0.540 |
| V1—O8               | 2.013(2) | 0.538 | V2—O6               | 1.6036(19) | 1.628 |
| V1—O9               | 1.591(2) | 1.685 | V2—N1               | 2.125(2)   | 0.398 |
|                     |          | 4.122 |                     |            | 3.960 |

  

| <b>5</b>            |            |       |                     |            |       |
|---------------------|------------|-------|---------------------|------------|-------|
| <b>Bonds</b>        |            |       | <b>Bonds</b>        |            |       |
|                     |            | v     |                     |            | v     |
| V1—O1               | 1.9608(17) | 0.620 | V2—O1 <sup>#1</sup> | 1.9981(17) | 0.561 |
| V1—O2 <sup>#1</sup> | 1.9992(17) | 0.559 | V2—O2               | 2.3268(18) | 0.231 |
| V1—O2               | 2.2973(16) | 0.249 | V2—O5               | 2.0020(18) | 0.555 |
| V1—O4               | 1.6031(16) | 1.631 | V2—O6               | 1.9969(19) | 0.562 |
| V1—O8               | 1.9900(18) | 0.573 | V2—O7               | 1.595(2)   | 1.667 |
| V1—N1               | 2.122(2)   | 0.401 | V2—O8               | 2.0056(17) | 0.549 |
|                     | sum        | 4.033 |                     | sum        | 4.124 |

  

| <b>6</b>            |          |       |                     |          |       |
|---------------------|----------|-------|---------------------|----------|-------|
| <b>Bonds</b>        |          |       | <b>Bonds</b>        |          |       |
|                     |          | v     |                     |          | v     |
| V1—O1               | 2.255(2) | 0.279 | V2—O1 <sup>#1</sup> | 1.992(2) | 0.570 |
| V1—O9               | 2.090(3) | 0.437 | V2—O1               | 2.389(2) | 0.195 |
| V1—O8               | 2.035(2) | 0.507 | V2—O7               | 2.017(3) | 0.533 |
| V1—O2 <sup>#1</sup> | 2.010(2) | 0.543 | V2—O5               | 1.617(2) | 1.570 |
| V1—O3 <sup>#1</sup> | 1.989(2) | 0.575 | V2—O2               | 2.007(2) | 0.547 |
| V1—O6               | 1.607(3) | 1.613 | V2—O3 <sup>#1</sup> | 2.003(2) | 0.553 |
|                     | sum      | 3.955 |                     | sum      | 3.969 |

## 7

| <b>Bonds</b> |          |       | <b>Bonds</b> |          |       |
|--------------|----------|-------|--------------|----------|-------|
|              |          | v     |              |          | v     |
| V1—O4        | 1.996(2) | 0.565 | V4—O4        | 2.012(2) | 0.539 |
| V1—O6        | 2.004(2) | 0.548 | V4—O5        | 2.003(2) | 0.553 |
| V1—O10       | 1.606(3) | 1.618 | V4—O7        | 2.006(2) | 0.548 |
| V1—O17       | 2.354(2) | 0.214 | V4—O8        | 2.010(2) | 0.542 |
| V1—O18       | 1.995(2) | 0.562 | V4—O13       | 1.608(3) | 1.609 |
| V1—O19       | 1.992(2) | 0.573 | V4—O17       | 2.282(2) | 0.260 |
|              | sum      | 4.081 |              | sum      | 4.054 |
| V2—O8        | 2.005(2) | 0.550 | V5—O1        | 2.006(2) | 0.548 |
| V2—O9        | 2.005(2) | 0.550 | V5—O2        | 1.998(2) | 0.561 |
| V2—O15       | 1.609(3) | 1.604 | V5—O12       | 1.609(3) | 1.605 |
| V2—O16       | 1.981(3) | 0.587 | V5—O16       | 1.995(3) | 0.565 |
| V2—O17       | 2.331(2) | 0.228 | V5—O17       | 2.368(2) | 0.206 |
| V2—O19       | 1.991(2) | 0.571 | V5—O18       | 2.007(2) | 0.547 |
|              | sum      | 4.092 |              | sum      | 4.033 |
| V3—O2        | 2.007(2) | 0.547 | V6—O1        | 1.999(2) | 0.559 |
| V3—O3        | 2.008(3) | 0.546 | V6—O3        | 1.996(2) | 0.564 |
| V3—O7        | 2.012(2) | 0.540 | V6—O5        | 2.009(2) | 0.544 |
| V3—O9        | 2.006(2) | 0.549 | V6—O6        | 2.017(2) | 0.533 |
| V3—O11       | 1.606(3) | 1.618 | V6—O14       | 1.611(3) | 1.596 |
| V3—O17       | 2.293(2) | 0.253 | V6—O17       | 2.233(2) | 0.297 |
|              | sum      | 4.052 |              | sum      | 4.094 |

## 8

| <b>Bonds</b> |          |        | <b>Bonds</b> |          |       |
|--------------|----------|--------|--------------|----------|-------|
|              |          | v      |              |          | v     |
| V1—O5        | 2.040(4) | 0.5001 | V5—O1        | 1.982(5) | 0.586 |
| V1—O7        | 2.028(5) | 0.517  | V5—O2        | 2.020(5) | 0.528 |
| V1—O11       | 2.011(5) | 0.541  | V5—O5        | 2.053(5) | 0.483 |
| V1—O12       | 2.005(5) | 0.550  | V5—O7        | 2.055(5) | 0.481 |
| V1—O18       | 1.594(5) | 1.671  | V5—O19       | 1.602(5) | 1.635 |
| V1—O23       | 2.304(4) | 0.245  | V5—O21       | 2.196(4) | 0.328 |
|              | sum      | 4.026  |              | sum      | 4.042 |
| V2—O4        | 1.940(5) | 0.656  | V6—O4        | 2.003(5) | 0.552 |
| V2—O5        | 2.315(4) | 0.238  | V6—O10       | 1.994(5) | 0.566 |
| V2—O21       | 1.955(4) | 0.629  | V6—O11       | 1.997(5) | 0.561 |
| V2—O22       | 1.657(4) | 1.401  | V6—O14       | 2.053(7) | 0.482 |
| V2—O23       | 1.973(4) | 0.600  | V6—O15       | 1.591(5) | 1.682 |
| V2—N2        | 2.111(6) | 0.413  | V6—O23       | 2.297(4) | 0.249 |
|              | sum      | 3.946  |              | sum      | 4.094 |
| V3—O1        | 2.331(6) | 0.228  | V7—O8        | 1.970(5) | 0.604 |
| V3—O2        | 2.075(4) | 0.455  | V7—O10       | 1.975(5) | 0.596 |
| V3—O17       | 1.588(6) | 1.696  | V7—O12       | 1.996(5) | 0.563 |
| V3—O21       | 1.947(4) | 0.644  | V7—O13       | 2.017(6) | 0.532 |

|                      |          |       |        |          |       |
|----------------------|----------|-------|--------|----------|-------|
| V3—O22 <sup>#3</sup> | 2.011(4) | 0.541 | V7—O16 | 1.595(6) | 1.664 |
| V3—N1                | 2.091(6) | 0.435 |        | sum      | 3.958 |
|                      | sum      | 3.999 |        |          |       |
| V4—O7                | 2.394(5) | 0.192 |        |          |       |
| V4—O8                | 1.966(5) | 0.610 |        |          |       |
| V4—O20               | 1.599(5) | 1.646 |        |          |       |
| V4—O21               | 1.970(5) | 0.604 |        |          |       |
| V4—O23               | 1.986(4) | 0.578 |        |          |       |
| V4—N3                | 2.132(6) | 0.389 |        |          |       |
|                      | sum      | 4.021 |        |          |       |

(#1)1-x,1-y,1-z; (#2)1-x,2-y, -z; (#3)1/2-x,1/2-y,1-z

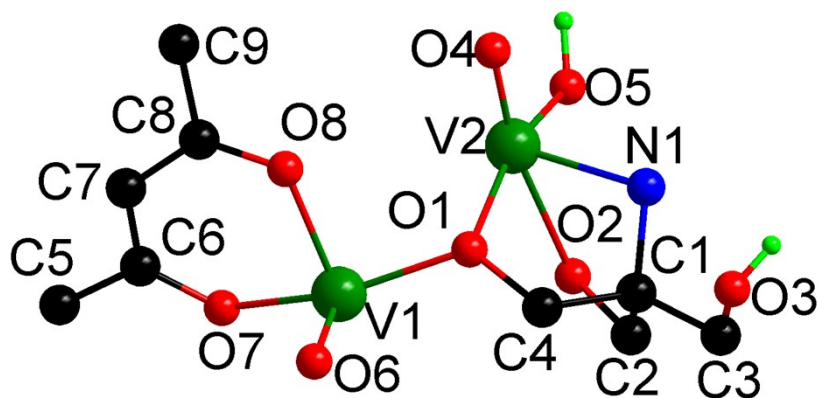

Fig. S1 The asymmetric unit of **1** (H atoms bonded to C and N atoms have been omitted for clarity).

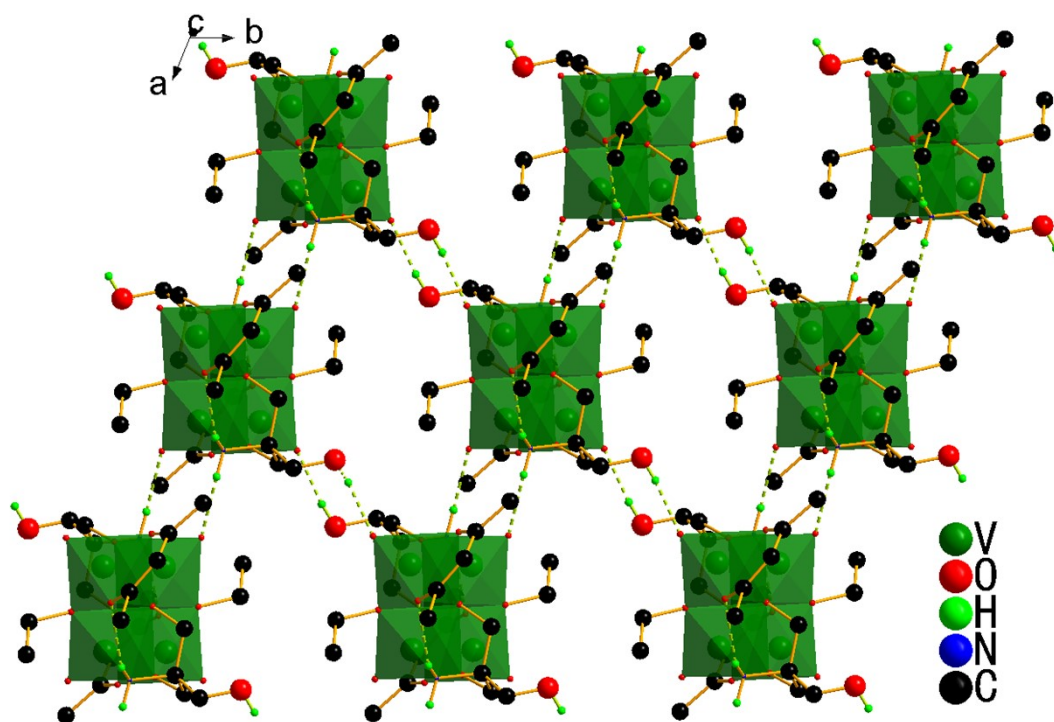

Fig. S2 The 2-D sql layer constructed by N-H $\cdots$ O and O-H $\cdots$ O H-bonds in **3a**. H atoms bonded to C and N atoms are omitted for clarity.

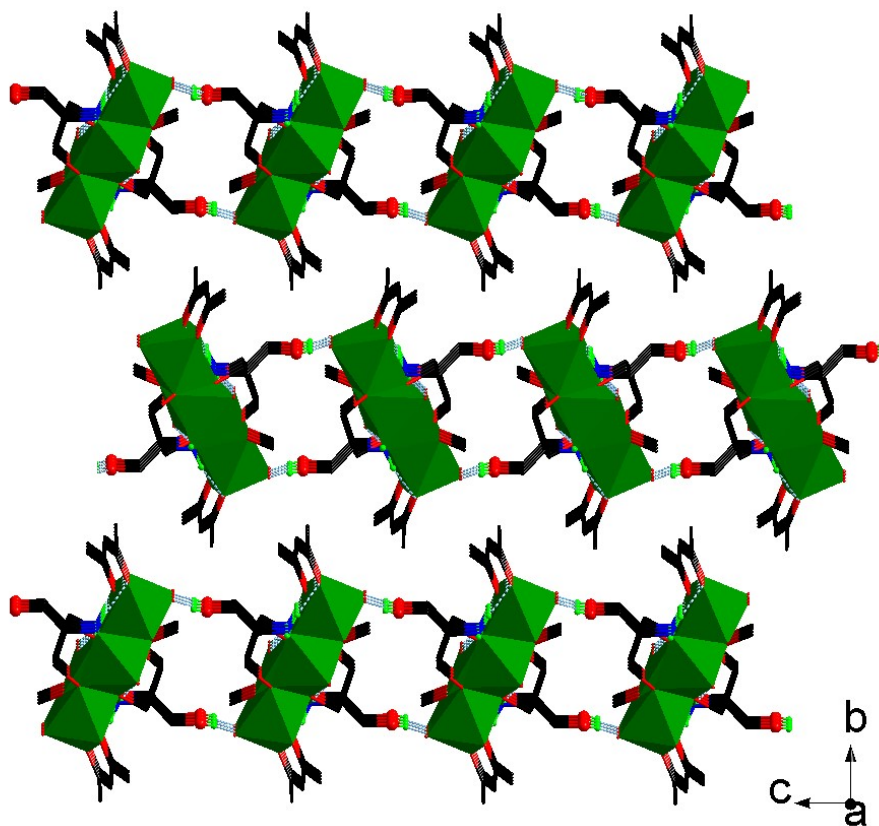

Fig. S3 The packing modes of the tetraavanadyl clusters in **2**.

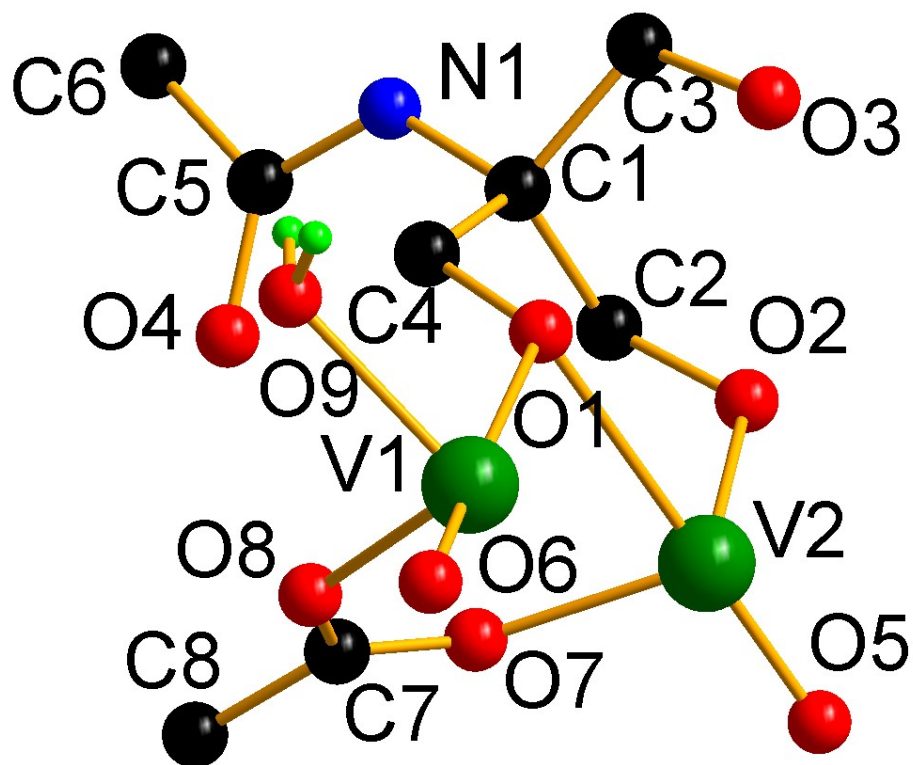

Fig. S4 The asymmetric unit of **6** (H atoms bonded to C and N atoms have been omitted for clarity).

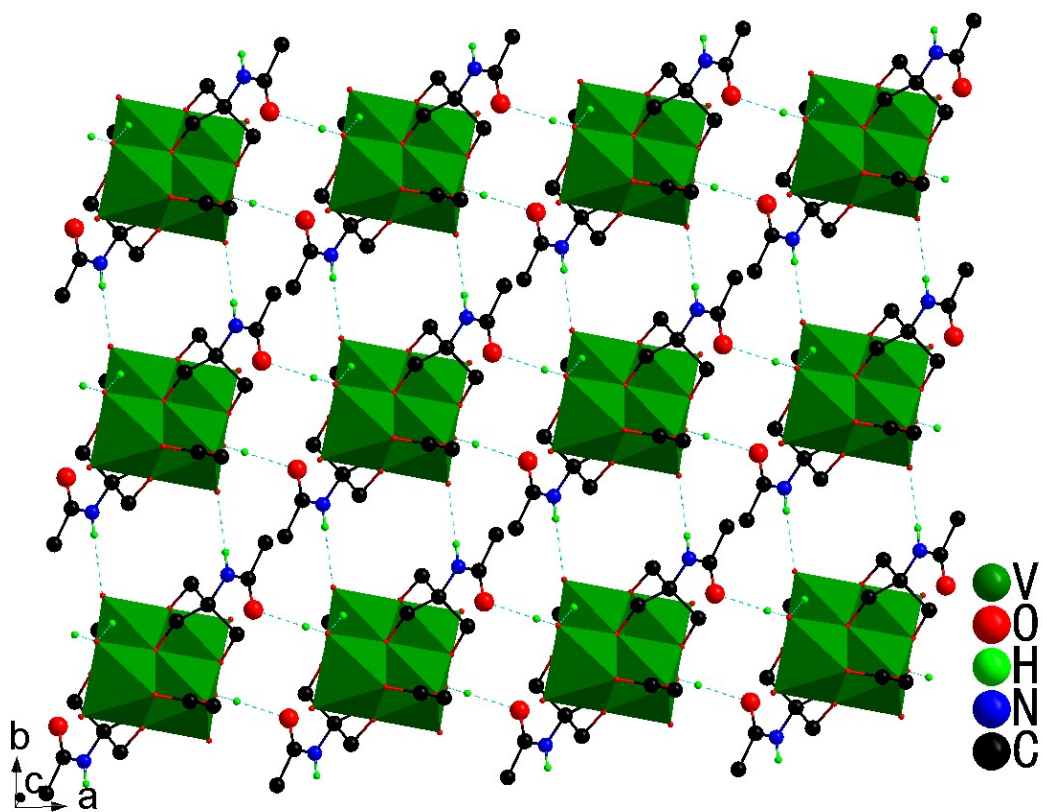

Fig. S5 The 2-D sql layer constructed by N-H $\cdots$ O and O-H $\cdots$ O H-bonds in **6**. H atoms bonded to C and N atoms are omitted for clarity.

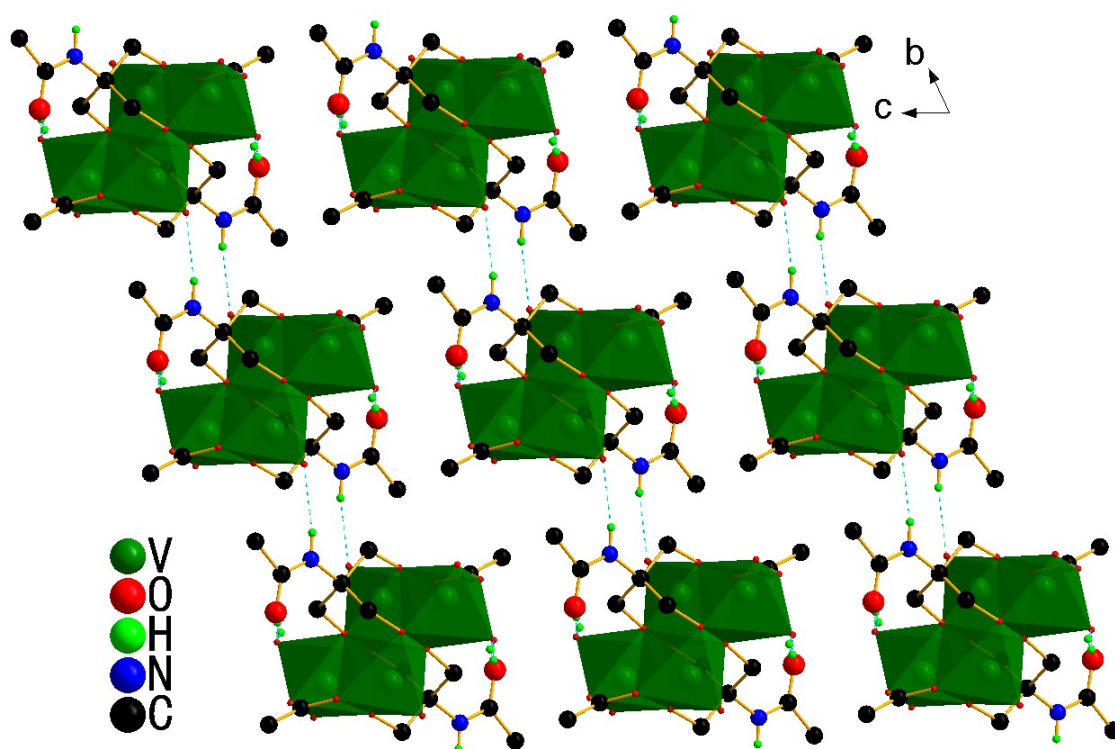

Fig. S6 The layers aligned in a parallel mode in **6**.

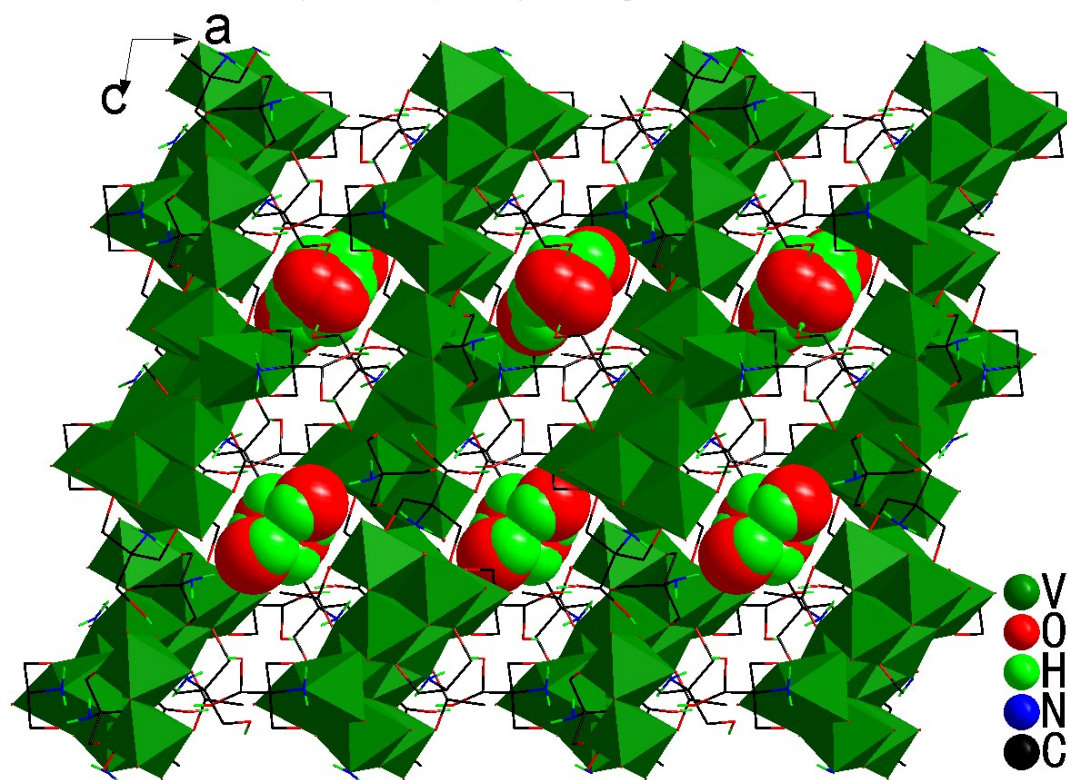

Fig. S7 The 3-D H-bonding network structure in **8**. H atoms bonded to C and N atoms are omitted for clarity.

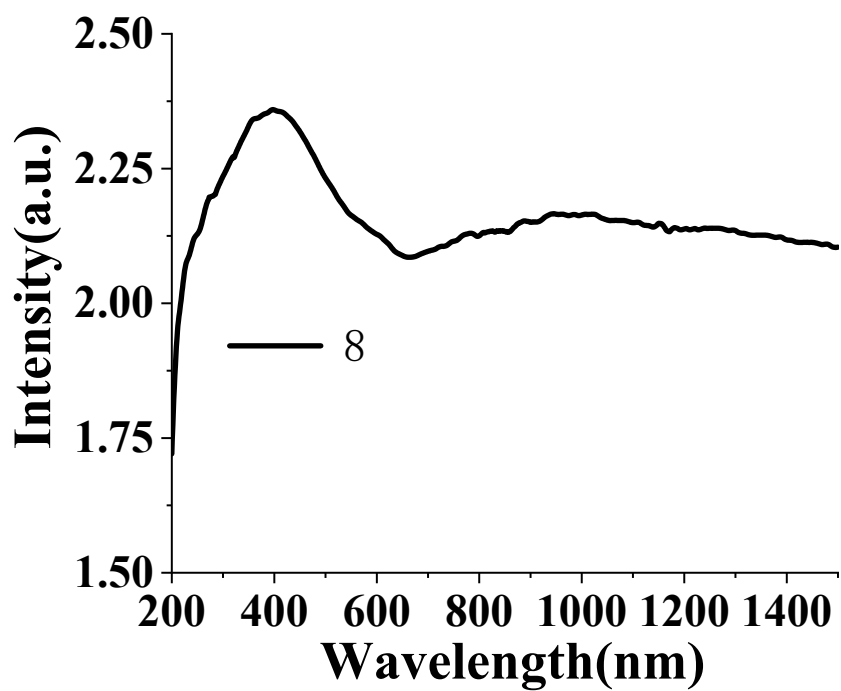

Fig. S8 UV-vis spectrum of 8.

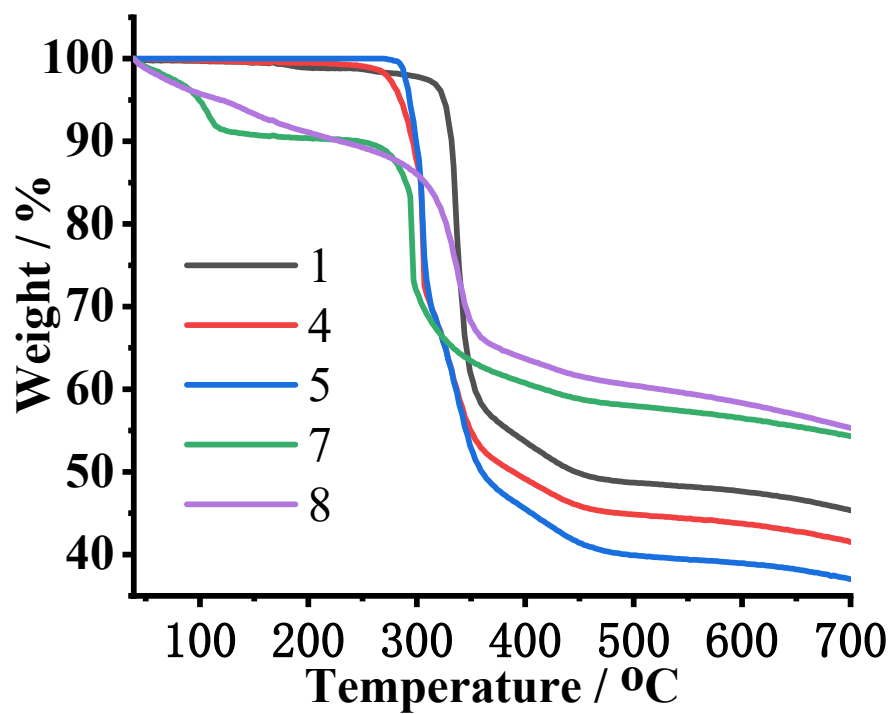



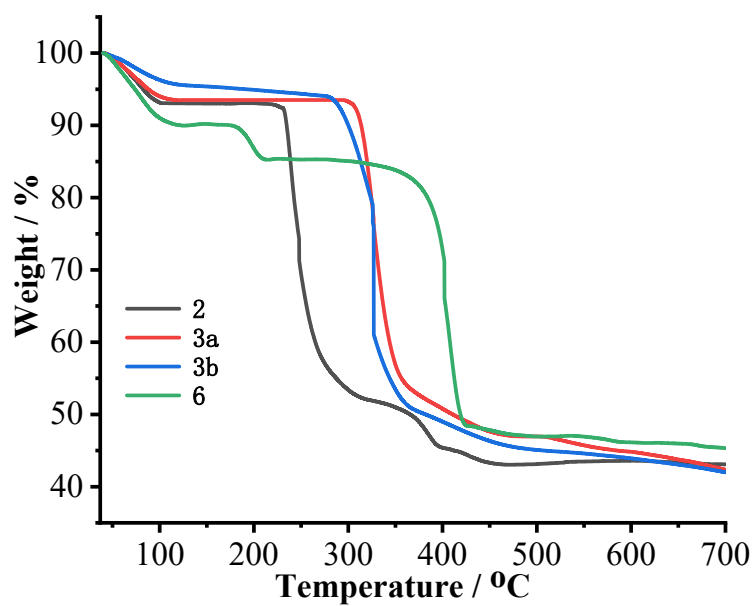

Fig. S9 The thermogravimetric curves of 1-8.

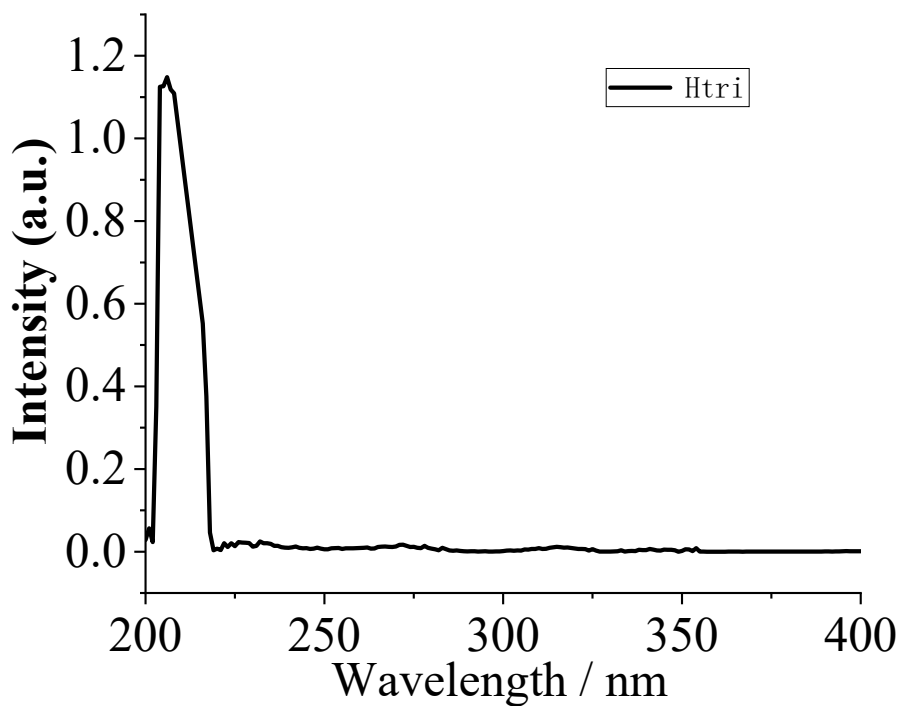

Fig. S10 UV-vis spectrum of Htri.

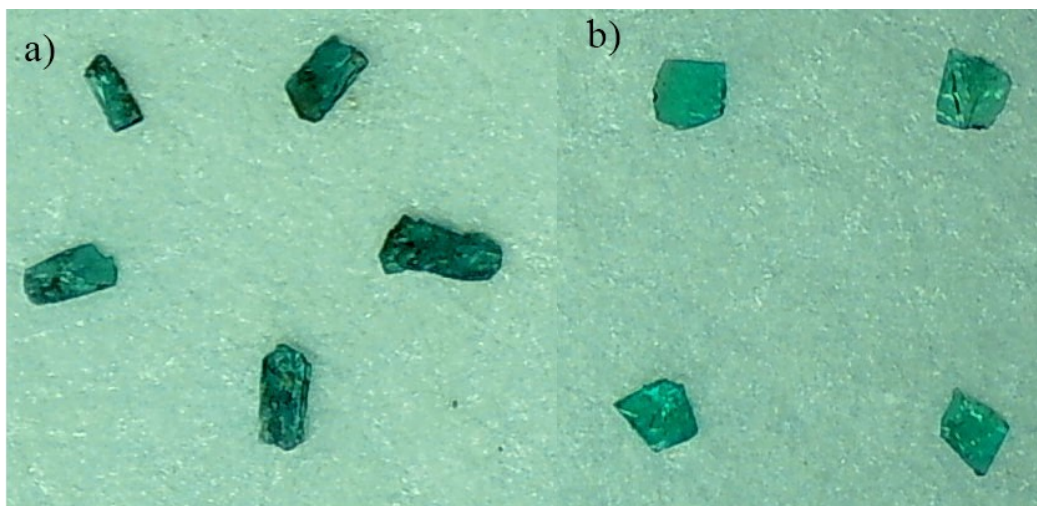

Fig. S11 Single crystal photo maps of **3a** and **3b**, showing different crystal shapes.

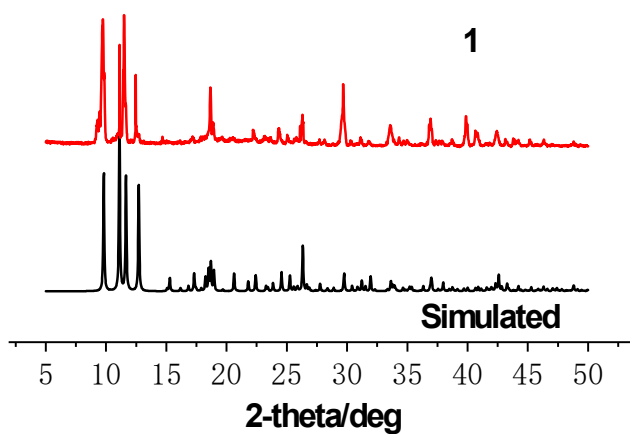

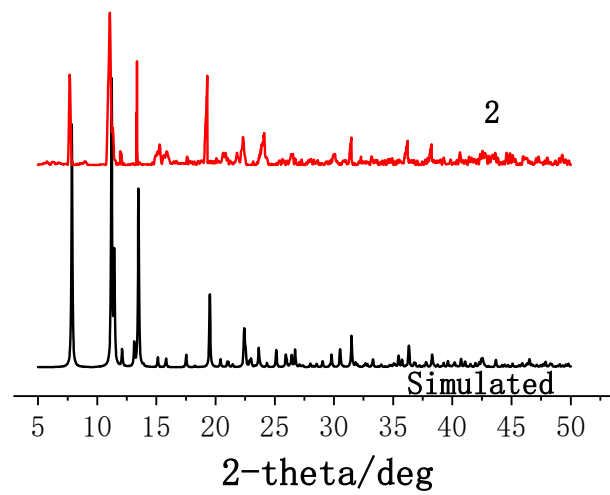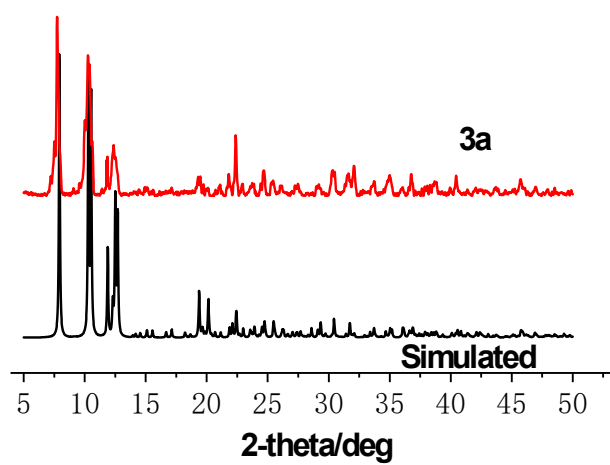

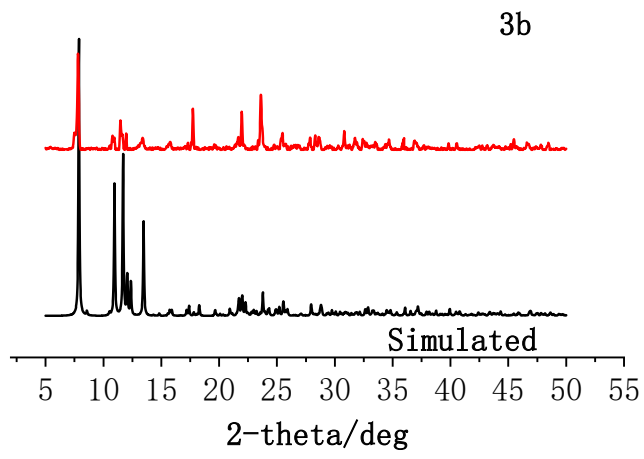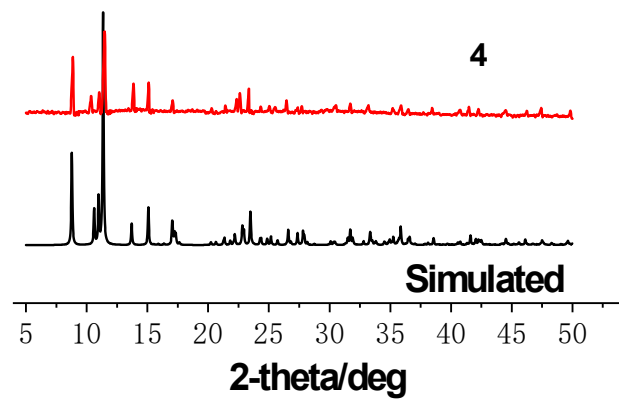

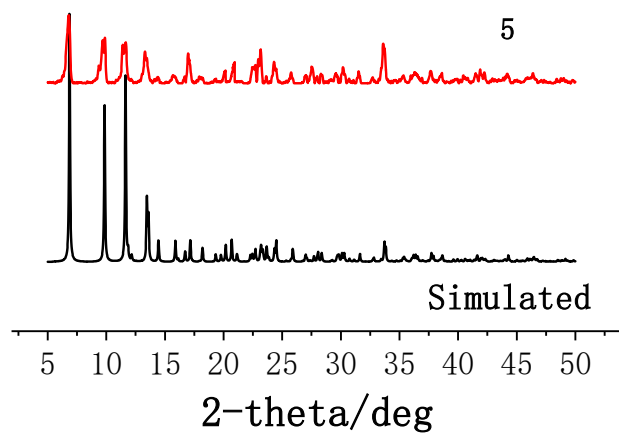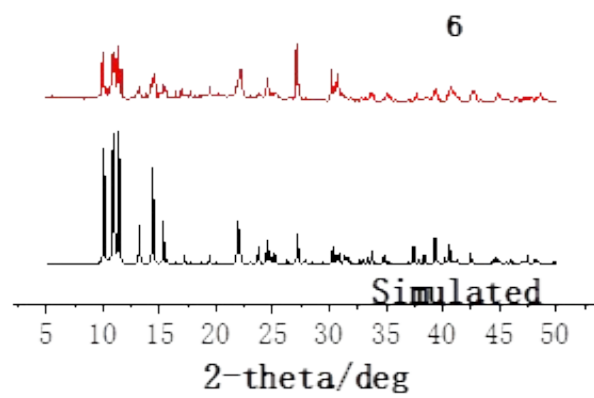

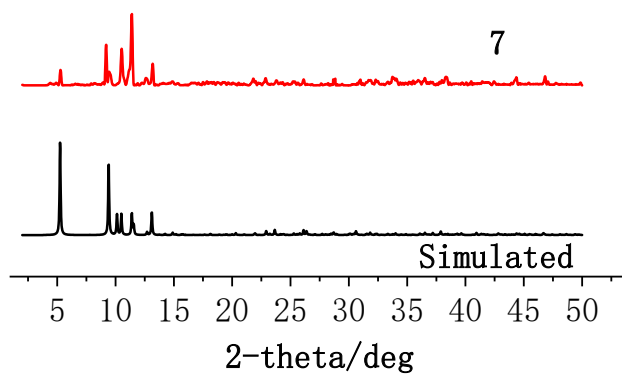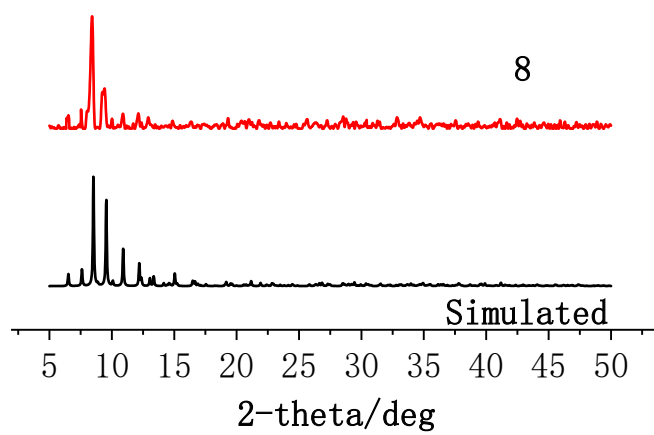

Fig. S12 Simulated and experimental powder XRD patterns of all compounds.
